# Supplementary material for: Elongation Factor Thermo Unstable (EF-Tu) Moonlights as an Adhesin on the Surface of Mycoplasma hyopneumoniae by Binding to Fibronectin
Source: Front Microbiol. 2018 May 15;9:974. doi: 10.3389/fmicb.2018.00974 (PMC5962738; doi:10.3389/fmicb.2018.00974)
Supplement: Supplementary file 1 [file Data_Sheet_1.CSV]

node1	node2	combined score
Enolase	DnaK	0.821
EF-Tu	DnaK	0.785
PepA	DnaK	0.751
P36	DnaK	0.737
Enolase	P36	0.687
EF-Tu	P36	0.656
PepA	P36	0.656
EF-Tu	PepA	0.634
PepA	Enolase	0.609
Apt	DnaK	0.605
EF-Tu	Enolase	0.582
PepA	MHJ_0125	0.568
P36	PdhA	0.551
Enolase	Apt	0.544
Enolase	SipS	0.531
MHJ_0125	SipS	0.493
MHJ_0662	P216	0.48
P46	P36	0.48
PepA	SipS	0.472
P36	SipS	0.466
Enolase	MHJ_0125	0.464
EF-Tu	SipS	0.462
MnuA	EF-Tu	0.461
P36	MHJ_0125	0.45
EF-Tu	MHJ_0125	0.449
Apt	SipS	0.447
P146	Enolase	0.447
EF-Tu	P46	0.447
MnuA	DnaK	0.447
PepA	Apt	0.444
P146	DnaK	0.442
EF-Tu	PdhA	0.402
